# Supplementary material
Source: ML conference proceedings conference paper supplement (https://openreview.net/forum?id=3eJx4mp-56)
Supplement: supplementary_material [file attachment]

# BeliefPPG: Uncertainty-aware Heart Rate Estimation from PPG signals via Belief Propagation

## (Supplementary Material)

Valentin Bieri<sup>\*1</sup>

Paul Strehl<sup>\*1</sup>

Berken Utku Demirel<sup>1</sup>

Christian Holz<sup>1</sup>

<sup>1</sup>Department of Computer Science, ETH Zürich, Switzerland

### A TRANSITION FUNCTION SELECTION

While we experimented with alternative distributions for the transition function, including LaPlacian, Gaussian, and Levy distributions of the absolute difference and relative difference in HR between two beat-to-beat intervals, we observed that our transition function using a discretized Gaussian prior fit on the logarithmic change  $\log \frac{y_t}{y_{t-1}}$  led to the best results while offering a reasonable fit to the observed histogram of heart range changes (see Figure 1).

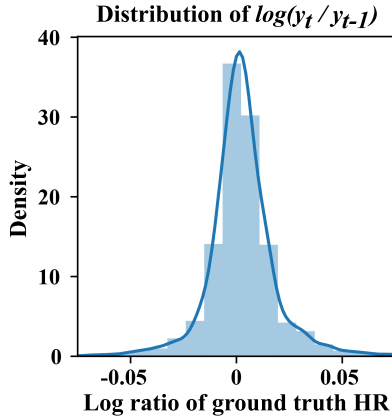

Figure 1: Logarithmic change of HR values in the IEEE dataset.

### B SELECTION OF $\sigma_y$

We represent the ground-truth HR  $y_t$  as a discretized normal distribution with density  $\mathcal{N}(y_t, \sigma_y^2)$ . The selection of the hyperparameter  $\sigma_y^2$  is based on an ablation study, and the results, as demonstrated in Table 1, indicate minimal sensitivity to variations in  $y_t$ .

Table 1: Ablations of BeliefPPG with different  $\sigma_y$  under LoSo-CV on BAMI-1. We report MAE, its standard deviation across subjects (STD) and the log-likelihood on the test set.

| $\sigma_y$ | 0.25  | 0.5  | 0.75  | 1.0   | 1.5          | 2.0   | 2.5   | 3.0  | 4.0   |
|------------|-------|------|-------|-------|--------------|-------|-------|------|-------|
| MAE        | 2.15  | 2.30 | 2.34  | 2.18  | <b>2.00</b>  | 2.45  | 2.29  | 2.45 | 2.35  |
| STD MAE    | 0.90  | 1.30 | 1.70  | 1.00  | <b>1.00</b>  | 1.80  | 1.50  | 1.50 | 1.40  |
| Log Lik.   | -4.13 | -4.2 | -4.22 | -4.13 | <b>-4.12</b> | -4.28 | -4.23 | -4.3 | -4.33 |

### C MAPE ACROSS ACTIVITIES

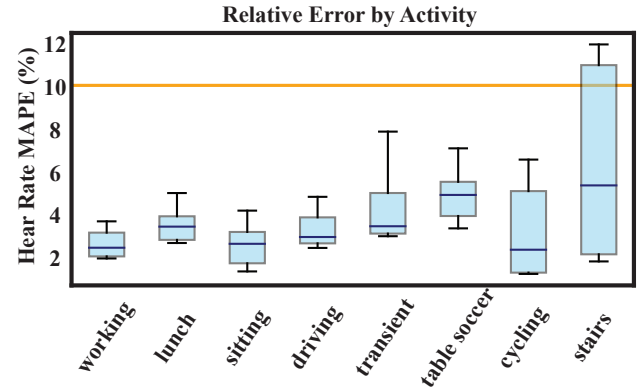

Figure 2: Mean absolute percentage errors (MAPEs) visualized by activity for LoSo on DaLiA. Boxes correspond to interquartile ranges and whiskers to 10th and 90th percentiles over subjects. The blue lines indicate the median, and the orange line marks the acceptable error of 10%.

Figure 2 presents the Mean Absolute Percentage Errors (MAPE) across activities compared to the AAMI standard [ANSI/AAMI, 2002] for the DaLiA dataset. The AAMI standard sets the acceptable limits for HR monitoring within  $\pm 10\%$ , which is implemented using the MAPE statistic as defined by the Consumer Technology Association [Association, 2018].

The results demonstrate that the median MAPE for all activ-

<sup>\*</sup>These authors contributed equally to this work

ities is significantly below this limit. Notably, none of the 15 peak detectors benchmarked by Charlton et al. [Charlton et al., 2022] achieved this level of accuracy.

## D ARCHITECTURE DETAILS

Table 2 provides architecture and training details. We implemented our network using TensorFlow 2.8.0.

### References

ANSI/AAMI. Cardiac monitors, heart rate meters, and alarms. *Arlington*, 2002.

Consumer Technology Association. Physical activity monitoring for heart rate, ansi/cta 2065, 2018. Accessed: 2023-02-17.

Peter H Charlton, Kevin Kotzen, Elisa Mejía-Mejía, Philip J Aston, Karthik Budidha, Jonathan Mant, Callum Pettit, Joachim A Behar, and Panicos A Kyriacou. Detecting beats in the photoplethysmogram: benchmarking open-source algorithms. *Physiological Measurement*, 43(8): 085007, aug 2022. doi: 10.1088/1361-6579/ac826d.

Table 2: Details about BeliefPPG’s heart rate network architecture and training configuration

| Heart rate network architecture                                                             |                                                                          |                              |             |         |                     |            |         |               |
|---------------------------------------------------------------------------------------------|--------------------------------------------------------------------------|------------------------------|-------------|---------|---------------------|------------|---------|---------------|
|                                                                                             | Up-/Downspl. fac.                                                        | Comment                      | Kernel Size | Padding | Filters / Inner Dim | Activation | Dropout | Output shape  |
| <b>Time-Frequency Branch</b> // <i>input shape: <math>(W_s, N_s, 2) = (7, 64, 2)</math></i> |                                                                          |                              |             |         |                     |            |         |               |
| 2x Conv2D                                                                                   | -                                                                        | -                            | 3x3         | same    | 32                  | leaky_relu | 0.1     | (7,64,32)     |
| embedding 4x                                                                                | -                                                                        | -                            | -           | -       | 32                  | -          | -       | 4 x (7,64,32) |
| 2x attention + reduce mean                                                                  | -                                                                        | reduces 1 <sup>st</sup> axis | -           | -       | -                   | -          | -       | (64, 32)      |
| 3x downsampling block (1D)                                                                  | 4                                                                        | stride=poolsize=4            | 3x1         | same    | 12, 24, 48          | relu       | 0.2     | (1, 48)       |
| bottleneck attention                                                                        | -                                                                        | -                            | 2x1         | -       | 48                  | tanh, relu | 0.2     | (1, 48)       |
| 3x upsampling block                                                                         | 4                                                                        | upspl. size=4                | 3x1         | same    | 48, 24, 12          | relu       | 0.2     | (64, 12)      |
| Conv1D                                                                                      | -                                                                        | -                            | 1x1         | same    | 1                   | softmax    | -       | (64,)         |
| <b>Time Branch</b> // <i>input shape: <math>(L_x, 1) = (1280, 1)</math></i>                 |                                                                          |                              |             |         |                     |            |         |               |
| Conv1D + bn + MaxPool                                                                       | 4                                                                        | dilation_rate=2              | 10          | causal  | 16                  | leaky_relu | 0.1     | (320, 16)     |
| Conv1D + bn + MaxPool                                                                       | 4                                                                        | dilation_rate=2              | 10          | causal  | 16                  | leaky_relu | 0.1     | (80, 16)      |
| LSTM                                                                                        | -                                                                        | -                            | -           | -       | 64                  | tanh       | 0.1     | (80, 64)      |
| LSTM                                                                                        | -                                                                        | -                            | -           | -       | 64                  | tanh       | 0.1     | (64,)         |
| Dense 2x                                                                                    | -                                                                        | -                            | -           | -       | 48                  | leaky_relu | -       | 2x (1, 48)    |
| <b>Training Parameters</b>                                                                  |                                                                          |                              |             |         |                     |            |         |               |
| Batch Size                                                                                  | 128                                                                      |                              |             |         |                     |            |         |               |
| Optimizer                                                                                   | Adam(lr=0.00025)                                                         |                              |             |         |                     |            |         |               |
| LR Scheduler                                                                                | ReduceLROnPlateau(factor=0.5, min_lr=1e-10 monitor="loss", patience=3)   |                              |             |         |                     |            |         |               |
| Stopping criterion                                                                          | EarlyStopping(patience=40 restore_best_weights=True, monitor="val_loss") |                              |             |         |                     |            |         |               |
| TTA: gaussian noise std                                                                     | 0.25                                                                     |                              |             |         |                     |            |         |               |
| TTA: max stretching factor                                                                  | 25%                                                                      |                              |             |         |                     |            |         |               |
| $\sigma_y$ : label standard deviation                                                       | 1.5                                                                      |                              |             |         |                     |            |         |               |
