# Supplementary material
Source: ML conference proceedings conference paper supplement (https://openreview.net/forum?id=3eJx4mp-56)

## Exclusion of uncertain predictions

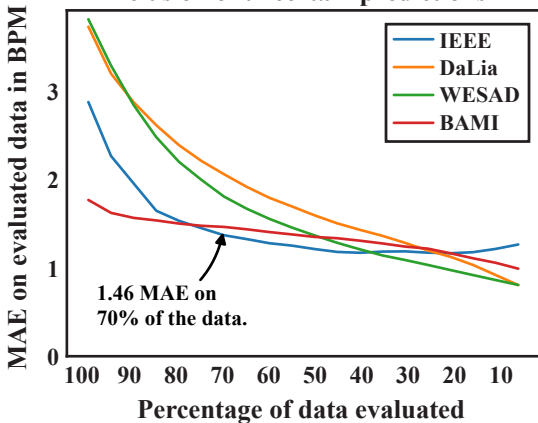

Supplement: supplementary_material [file attachment]

**Distribution of  $\log(y_t / y_{t-1})$**

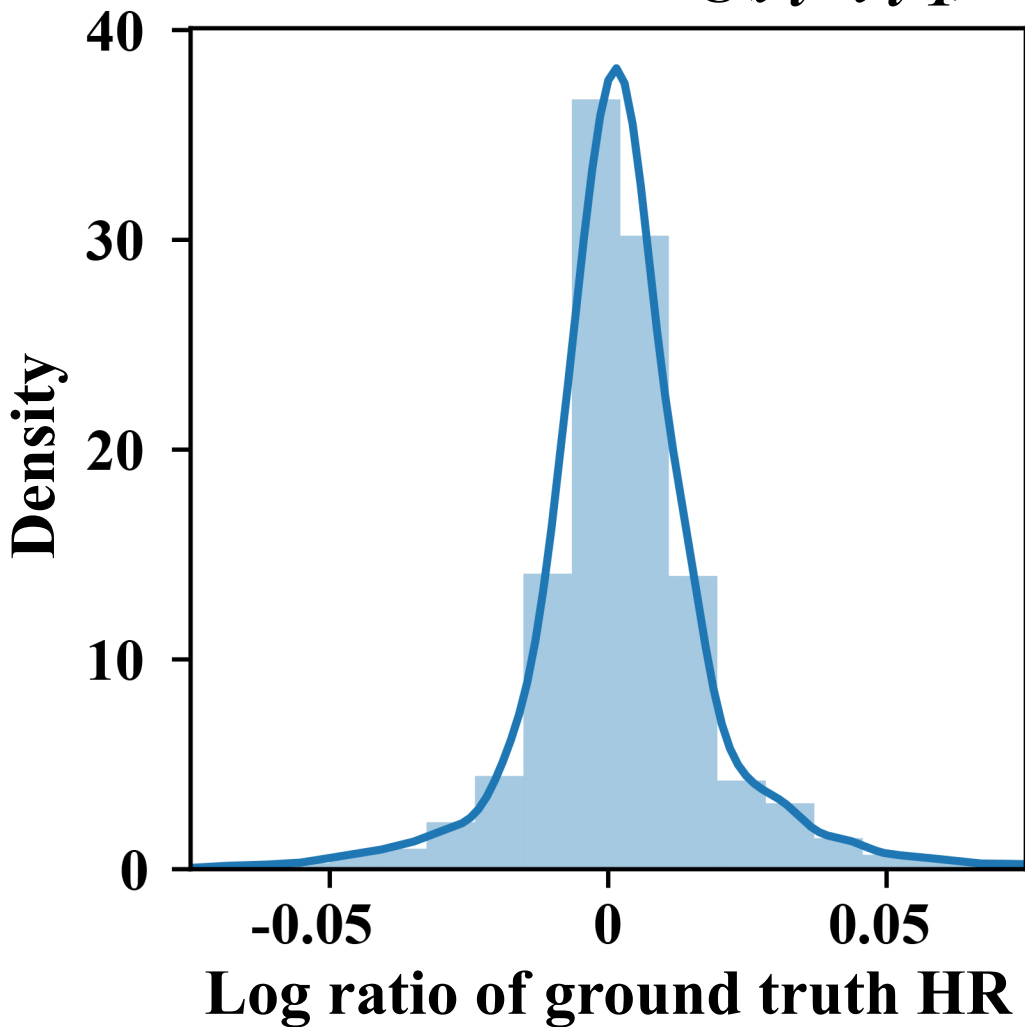

Supplement: supplementary_material [file attachment]

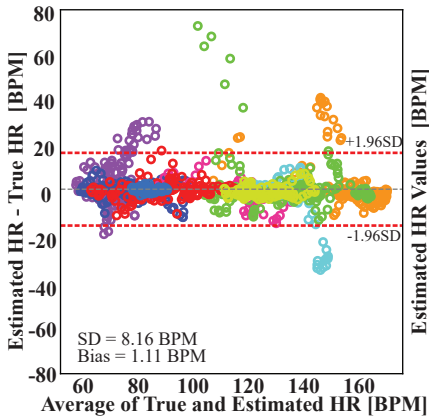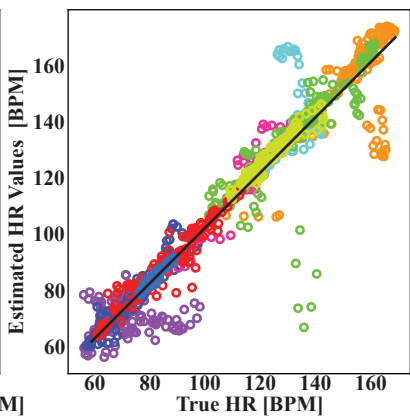

Supplement: supplementary_material [file attachment]

**Relative Error by Activity**

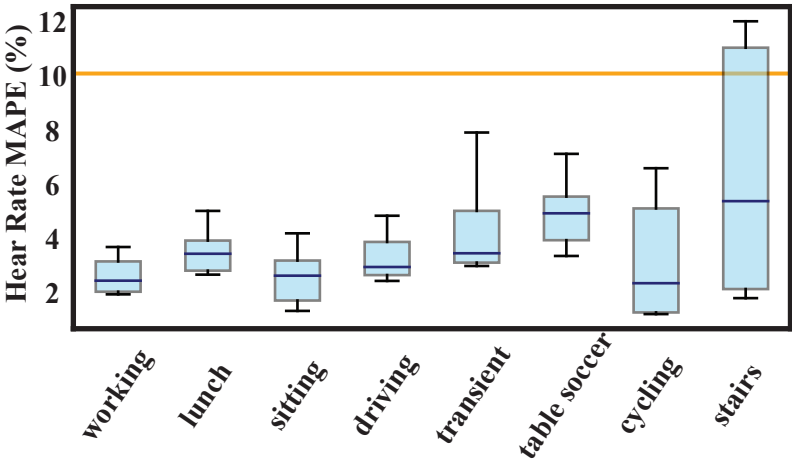

Supplement: supplementary_material [file attachment]

Calibration Plot

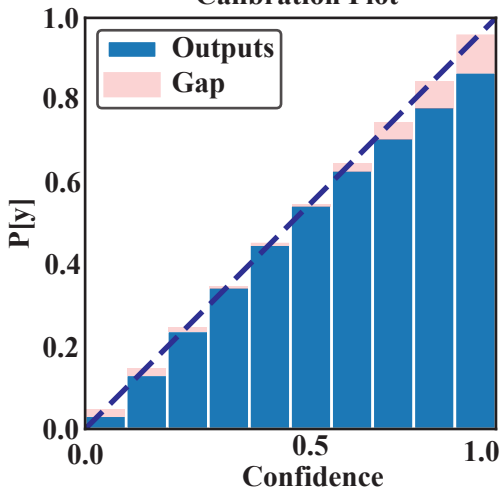

Supplement: supplementary_material [file attachment]

### Time Domain

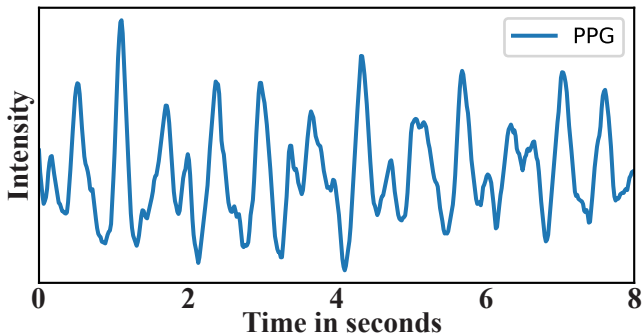

### Frequency Domain

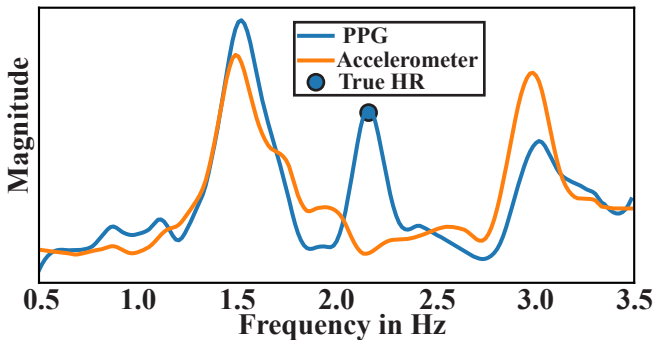

Supplement: supplementary_material [file attachment]
